# Supplementary material
Source: MDPI journal article supplement (https://www.mdpi.com/1424-2818/13/8/348)
Supplement: s1 [file s1]

# Supplementary Materials

## Manuscript title

Distinct reproductive strategy of two endemic Amazonian quillworts

## Authors

Cecilio F. Caldeira<sup>1\*</sup>; Arthur V. S. Lopes<sup>2</sup>; Keyvilla C. Aguiar<sup>1</sup>; Aline L. Ferreira<sup>2</sup>; João V.S. R. Araujo<sup>2</sup>; Vinnícius M. S. Gomes<sup>2</sup>; Daniel B. Zandonadi<sup>2</sup>; Cinthia B. Abranches<sup>1</sup>; Silvio J. Ramos<sup>1</sup>; Markus Gastauer<sup>1</sup>; Naiara V. Campos<sup>2</sup>; Lísia M. S. Gestinari<sup>2</sup>; Luis A. Prado<sup>2</sup>; Fernando Marino Gomes dos Santos<sup>3</sup>; Rodrigo L. Martins<sup>2</sup>; Francisco A. Esteves<sup>2</sup>; Guilherme Oliveira<sup>1</sup>; Mirella P Santos<sup>2\*</sup>

## Author affiliations

<sup>1</sup>Instituto Tecnológico Vale – Belém 35400-000, Pará, Brazil

<sup>2</sup>Instituto de Biodiversidade e Sustentabilidade NUPEM/UFRJ – Macaé 27900-000, Rio de Janeiro, Brazil

<sup>3</sup> Environmental Studies Office, Vale, Belo Horizonte, Minas Gerais, Brazil

## \*Corresponding author

[cecilio.caldeira@itv.org](mailto:cecilio.caldeira@itv.org), Instituto Tecnológico Vale. Boaventura da Silva, 955. Belém/PA, Brazil

Table S1. Experimental setup applied to examine the sexual reproduction of two *Isoëtes* L. species endemic to Serra dos Carajás/Brazil.

| # | Species                        | Number of plants | Number of reps | Number of megaspores | Total of megaspores |
|---|--------------------------------|------------------|----------------|----------------------|---------------------|
| 1 | <i>Isoëtes serracarajensis</i> | 2                | 13 (5-4-4)*    | 23 - 40              | 448                 |
| 2 | <i>Isoëtes cangae</i>          | 6                | 34 (17-12-5)   | 15 - 50              | 1280                |
| 3 | <i>Isoëtes cangae</i>          | 2                | 12 (4-4-4)     | 40 - 50              | 540                 |
| 4 | <i>Isoëtes cangae</i>          | 3                | 21 (6-6-2)     | 50                   | 700                 |
| 5 | <i>Isoëtes cangae</i>          | 2                | 12 (4-4-4)     | 50 - 100             | 1000                |

\*Number of repetitions per treatment are shown between parentheses for self-fertilization, cross-fertilization and apomixis.

## Supplementary Materials

Table S2. Description of ISSR polymorphic primers validated for the genus *Isoetes*.

| ID      | SEQUENCES                       | At (°C) | TNL |
|---------|---------------------------------|---------|-----|
| LB(14)  | 5'- GAGAGAGAGAGAGAGAT- 3'       | 45,5 °C | 10  |
| LB(10)  | 5'- ACACACACACACACACG- 3'       | 53 °C   | 7   |
| LB(6)   | 5'- ACACACACACACACACCC- 3'      | 52 °C   | 9   |
| LB(5)   | 5'- AGAGAGAGAGAGAGAGYT- 3'      | 52 °C   | 8   |
| LB(52)  | 5'-ATCATCATCATCATCATCC-3'       | 48 °C   | 8   |
| LB (18) | 5-AGAAGAAGAAGAAGAAGAAGAAGAYC-3' | 50 °C   | 10  |

ID: Identification of the primers Sequences (5'-3'); At (°C): annealing temperature;  
TNL: total number of loci

## Supplementary Materials

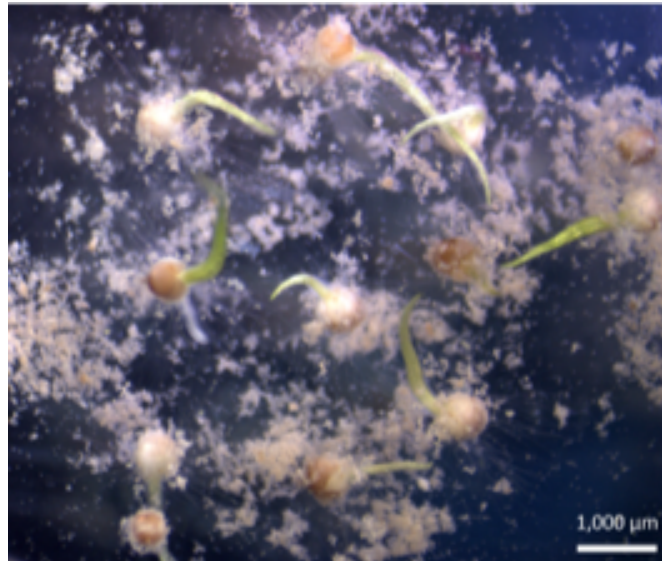

Figure S1. A subset of *Isoetes cangae* germinated megaspores from apomixis treatment (isolated for 15 days after rhizoid emission and archegonia appearance) that developed into sporophytes a few days after microspore addition.

## Supplementary Materials

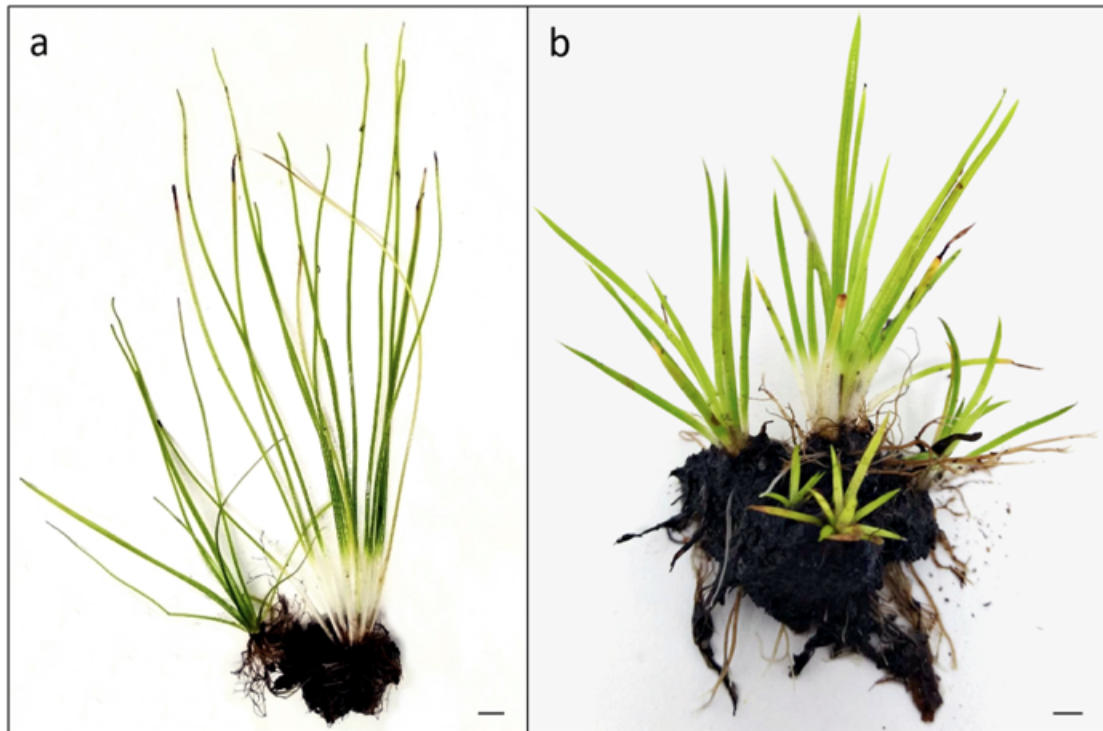

Figure S2. Mother plants and their respective sporophytes of *Isoetes cangae* (a) and *Isoetes serracarajensis* (b) reproduced in greenhouse conditions.

## Supplementary Materials

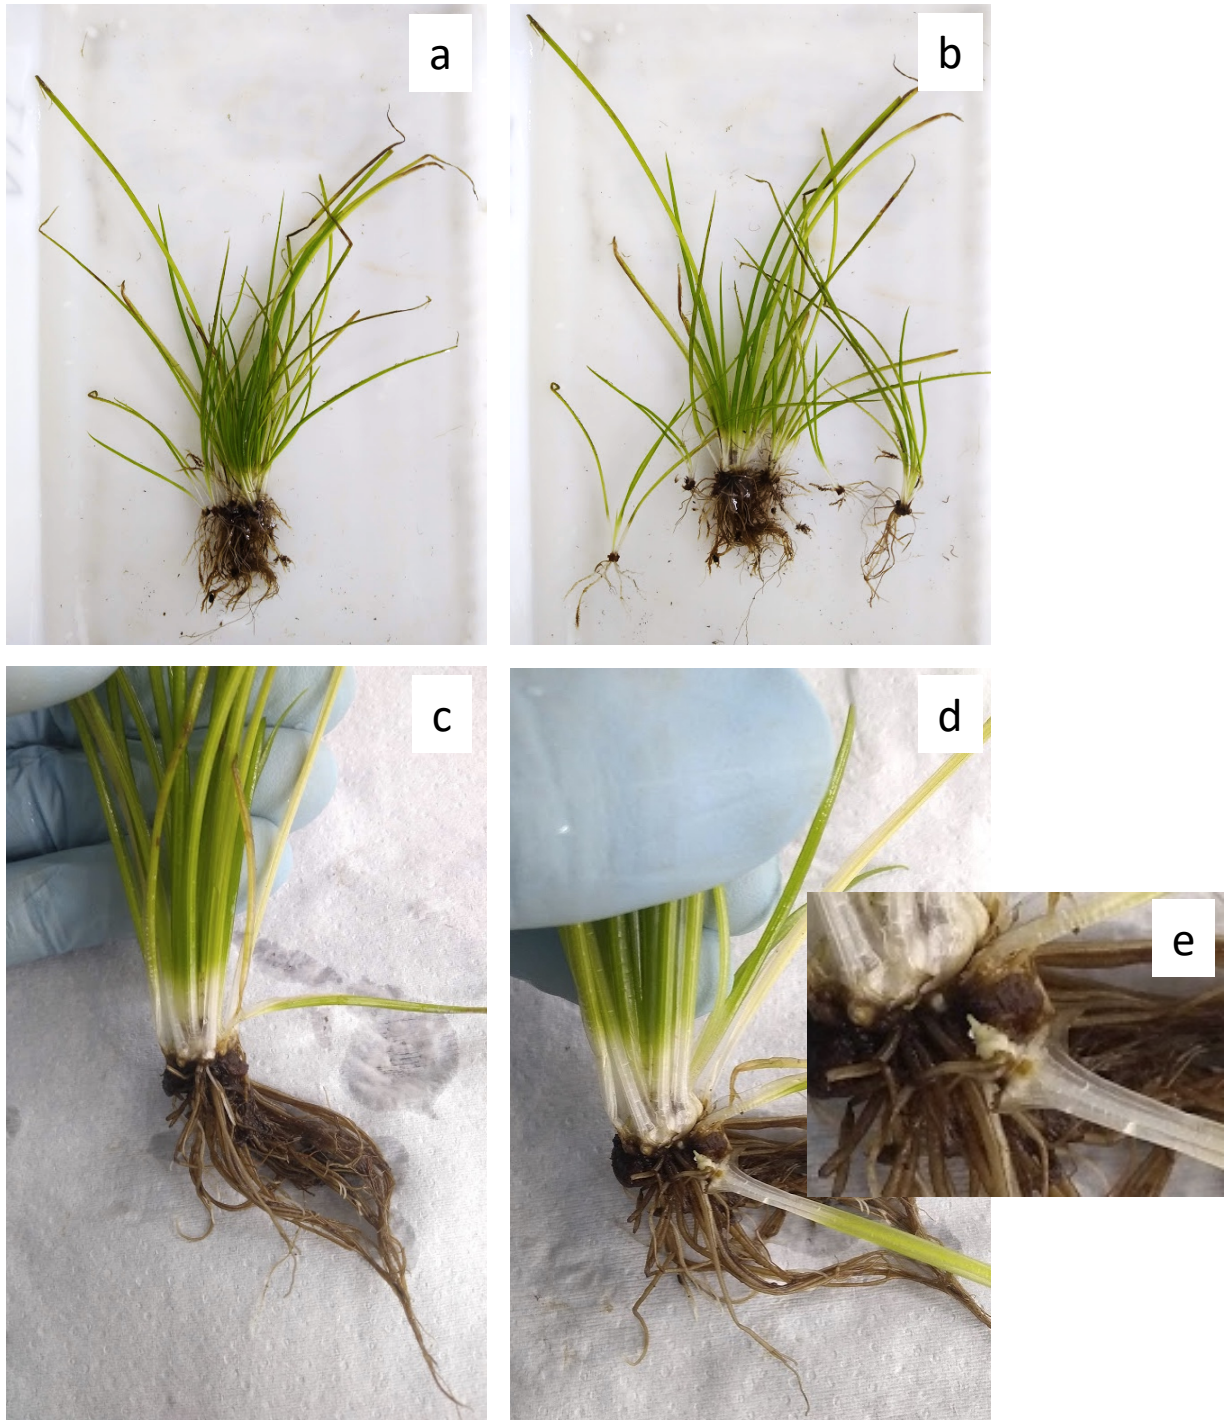

Figure S3. The vegetative reproduction of *Isoetes serracarajensis*. (a) and (b) New sporophytes (tillers) attached to the mother plant that can easily be detached. (c) and (d) Another adult plant and its respective tillers. (e) Details of root emission from the new corm fragment at the leaf base.
